# Supplementary material
Source: publisher site journal article supplement (https://www.spandidos-publications.com/4647/downloadSupplementary)

Figure S1. Changes in body weight of mice during PZH treatment. Statistical analysis of all mouse body weight between CCl<sub>4</sub>-induced (control) and PZH-treated groups during 8 weeks of the experiment. Data are presented as the median  $\pm$  SD. CCl<sub>4</sub>, carbon tetrachloride; PZH, Pien Tze Huang.

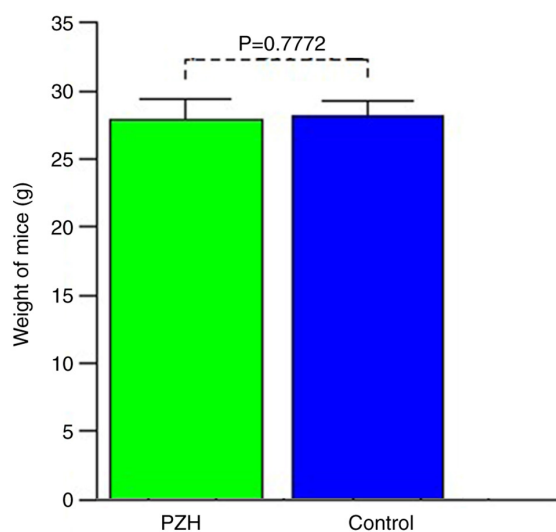

Figure S2. GO enrichment analysis for differentially expressed circular RNA-related target genes. (A) Top five GO terms in the cellular component category. (B) Top five GO terms in the molecular function category.  $P < 0.05$  was considered to indicate a statistically significant difference. AP-1, activator protein 1; GO, Gene Ontology.

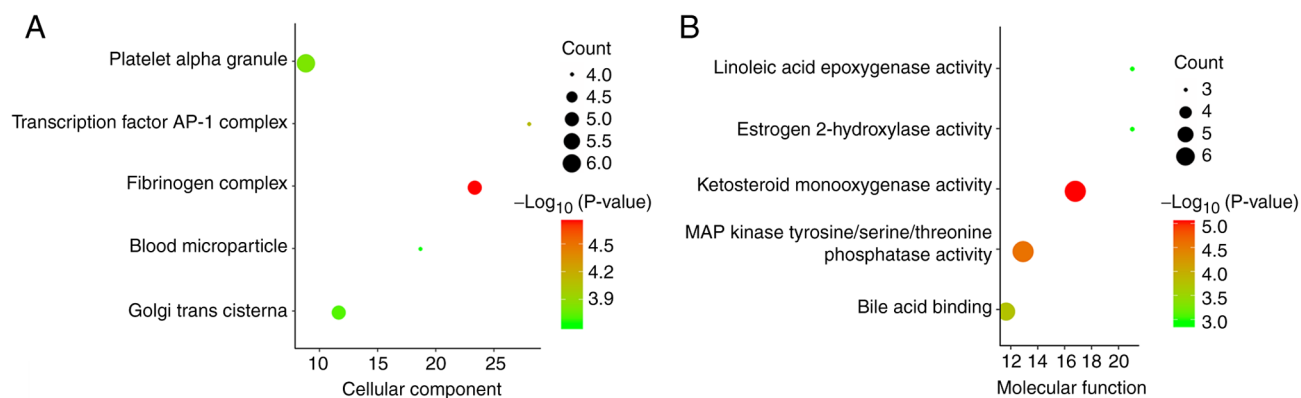

Supplement: Supplementary file 1 [file downloadSupplementary]
